# Supplementary material for: Suppression of host gene expression is associated with latent TB infection: a possible diagnostic biomarker
Source: PubMed Central journal article supplement (PMC11228037; doi:10.1038/s41598-024-66486-z), 2024-07-07
Supplement: 41598_2024_66486_MOESM1_ESM.pdf [file 41598_2024_66486_MOESM1_ESM.pdf]

**Title: Suppression of host gene expression is associated with latent TB infection: a possible diagnostic biomarker.**

Ritah Nakiboneka<sup>1,3,4,5,7</sup>; Nicolò Margaritella<sup>2</sup>; Tonney Nyirenda<sup>3</sup>; David Chaima<sup>3</sup>; Natasha Walbaum<sup>1</sup>; Emmanuel Musisi<sup>1,6</sup>; Sikwese Tionge<sup>4</sup>; Takondwa Msosa<sup>4</sup>; Marriott Nliwasa<sup>3,4</sup>; Chisomo L. Msefula<sup>3,4,5</sup>; Derek Sloan<sup>1</sup>; Wilber Sabiti<sup>1\*</sup>.

**Supplementary methods Table 1: Summary of the evaluated host gene markers and their biological functions**

| Gene symbol and Publications             | Gene Full Name                                                                            | Biological function                                                                                                                                                                                                                                                                                                                                                                                                                                                                    |
|------------------------------------------|-------------------------------------------------------------------------------------------|----------------------------------------------------------------------------------------------------------------------------------------------------------------------------------------------------------------------------------------------------------------------------------------------------------------------------------------------------------------------------------------------------------------------------------------------------------------------------------------|
| <i>GBP5</i><br>15,17,21,41-45            | Guanylate-binding protein family member 5                                                 | <i>GBP5</i> is an interferon gamma (IFN- $\gamma$ ) induced gene that plays a role in innate immunity and inflammation <sup>46</sup> . Its encoded protein activates the NLRP3 inflammasome assembly.                                                                                                                                                                                                                                                                                  |
| <i>GBP6</i><br>15,17,41,47-49            | Guanylate-binding protein family member 6                                                 | <i>GBP6</i> is an IFN- $\gamma$ induced gene that is reported to offer protection from several pathogens <sup>50</sup> . Suppressed levels of this gene have been linked to poor cell differentiation <sup>51</sup> .                                                                                                                                                                                                                                                                  |
| <i>CIQB</i> <sup>15,17,41,48,49,52</sup> | Complement C1q B Chain                                                                    | Is involved in innate and adaptive immunity where it activates the classical complement system. The complement cascade part of the immune system enhances the ability of phagocytic cells and antibiotics to kill microbes, clear damaged cells, and induce inflammation <sup>53</sup> . <i>CIQB</i> proteins are involved in T cell activation following antigen presentation.                                                                                                        |
| <i>CD64</i><br>15,17,21,42,47,48         | Cluster of Differentiation 64                                                             | Also known as <i>CD64A</i> - Fc fragment of IgG receptor Ia ( <i>FCGR1A</i> ) and <i>CD64b</i> - Fc fragment of IgG receptor Ib ( <i>FCGR1B</i> ) <i>CD64</i> is involved in IFN- $\gamma$ signalling pathway and is induced by IFN- $\gamma$ <sup>54</sup> . It encodes a high-affinity Fc-gamma receptor protein that binds IgG with high affinity <sup>55</sup> . <i>CD64</i> is highly expressed on resting monocytes, macrophages <sup>56</sup> , and neutrophils <sup>57</sup> . |
| <i>GAS6</i><br>15,17,47,58               | Growth arrest specific 6                                                                  | It was originally found as a gene upregulated by growth arrested fibroblasts. It's Involved in stimulation of cell proliferation. This gene is frequently overexpressed in many cancers and has been implicated as an adverse prognostic marker <sup>59</sup>                                                                                                                                                                                                                          |
| <i>BATF2</i><br>15,17,21,43,49           | Basic Leucine Zipper Transcription Factor 2                                               | <i>BATF2</i> participates in the immune system through controlling differentiation of lineage specific cells <sup>60</sup> .                                                                                                                                                                                                                                                                                                                                                           |
| <i>DUSP3</i><br>17,44,47                 | Dual specificity phosphatase 3                                                            | <i>DUSP3</i> encodes a protein that is responsible for inactivating of target kinases and regulating mitogen-activated protein (MAP) kinase members <sup>32</sup> . The MAP kinase members are associated with cellular proliferation and differentiation. Thus, <i>DUSP3</i> is involved in cellular proliferation and differentiation regulation <sup>32</sup> .                                                                                                                     |
| <i>ASUN</i> <sup>18,61</sup>             | Asunder spermatogenesis regulator<br>Also known as Integrator complex subunit 13 (INTS13) | Is a cell cycle regulator that acts in the nucleus in connection with other integrator components to mediate recruitment of dynein to the nucleus envelope <sup>36</sup> .                                                                                                                                                                                                                                                                                                             |
| <i>DHX29</i> <sup>18,61</sup>            | DExH-box helicase 29                                                                      | Encoded protein functions in translation initiation <sup>62</sup> and is specifically required for ribosomal scanning across stable mRNA during initiation codon selection <sup>63</sup>                                                                                                                                                                                                                                                                                               |
| <i>KLF2</i> <sup>44</sup>                | Krüppel-like Factor 2                                                                     | Regulates several inflammatory genes and cytokines through regulating the transcriptional activity of NF- $\kappa$ B through competitive interaction with P300/CBP-associated factor (PCAF) <sup>28</sup>                                                                                                                                                                                                                                                                              |
| <i>ZNF296</i> <sup>47,49</sup>           | Zinc finger protein 296                                                                   | Is predicted to be involved in positive regulation of transcription by RNA Polymerase II and spermatogenesis <sup>29</sup>                                                                                                                                                                                                                                                                                                                                                             |
| <i>PTPRC</i> <sup>18,61</sup>            | Protein tyrosine phosphatase, receptor type, C                                            | Also known as <i>CD45</i> is an essential regulator of T- and B-cell antigen receptor signalling <sup>33</sup> . Protein Tyrosine Phosphatases are known to be signalling molecules that regulate a variety of cellular processes including cell growth, differentiation, mitosis, and oncogenic transformation <sup>64</sup> .                                                                                                                                                        |
| <i>NEMF</i> <sup>18,61</sup>             | Nuclear export mediator factor                                                            | Is part of the ribosome quality control complex, a ribosome-associated complex that mediates ubiquitination and extraction of incompletely synthesized nascent chains for proteasomal degradation <sup>34</sup> .                                                                                                                                                                                                                                                                      |
| <i>ARG1</i> <sup>47,49</sup>             | Arginase                                                                                  | The <i>ARG1</i> gene provides instructions for producing the enzyme arginase. Arginase enzyme participates in the urea cycle, a series of reactions that occurs in liver cells. Increased expression of <i>ARG1</i> induced by MTB reduces the production of nitric oxide required for MTB killing <sup>65</sup> . Has been reported to be expressed in increased amounts in the granuloma of TB patients <sup>66</sup> .                                                              |

### *Supplementary analysis 1: Influential point (DifChiSQ) analysis*

Summary table of the influential points for all models tested. Observations with a score of >5 and >10 are reported.

| <b>Gene marker</b> | <b>DifChiSq statistic &gt; 5</b> | <b>DifChiSq statistic &gt; 10</b> |
|--------------------|----------------------------------|-----------------------------------|
| 1. <i>ZNF296</i>   | <b>19, 24</b>                    | <b>19, 24</b>                     |
| 2. <i>PTPRC</i>    | 9, <b>19, 24</b>                 | <b>19</b>                         |
| 3. <i>KLF2</i>     | 5, <b>19, 24</b>                 | <b>19, 24</b>                     |
| 4. <i>GBP6</i>     | 9, <b>19, 24</b>                 | 0                                 |
| 5. <i>ASUN</i>     | 4, 5, 9, <b>19</b>               | <b>19</b>                         |
| 6. <i>NEMF</i>     | 5, 9, <b>19</b>                  | <b>19</b>                         |
| 7. <i>DUSP3</i>    | 5, 9, <b>19, 24</b>              | <b>24</b>                         |
| 8. <i>GAS6</i>     | 5, <b>19, 20, 24</b>             | 0                                 |
| 9. <i>GBP5</i>     | 5, 9, <b>19, 24</b>              | <b>24</b>                         |
| 10. <i>CIQB</i>    | 5, 20, <b>24</b>                 | 0                                 |
| 11. <i>ARG1</i>    | 5, <b>19, 20, 24</b>             | 0                                 |
| 12. <i>DHX29</i>   | <b>19, 20, 24</b>                | 0                                 |
| 13. <i>CD64</i>    | <b>19, 20, 24</b>                | 0                                 |
| 14. <i>BATF2</i>   | <b>19, 20</b>                    | 0                                 |

*Supplementary Analysis 2: Logistic regression for each gene expression marker corrected for Age + Yield.*

| <p><b>ZNF296</b></p> <p>Coefficients:</p> <table border="1"> <thead> <tr> <th></th> <th>Estimate</th> <th>Std. Error</th> <th>z value</th> <th>Pr(&gt; z )</th> </tr> </thead> <tbody> <tr> <td>(Intercept)</td> <td>12.59263</td> <td>6.76690</td> <td>1.861</td> <td>0.06276 .</td> </tr> <tr> <td>Age</td> <td>0.18780</td> <td>0.06688</td> <td>2.808</td> <td>0.00499 **</td> </tr> <tr> <td>Yield</td> <td>-0.02307</td> <td>0.01416</td> <td>-1.629</td> <td>0.10340</td> </tr> <tr> <td>ZNF296</td> <td>-6.55833</td> <td>2.50249</td> <td>-2.621</td> <td>0.00877 **</td> </tr> </tbody> </table>  |           | Estimate   | Std. Error | z value      | Pr(> z ) | (Intercept) | 12.59263 | 6.76690 | 1.861  | 0.06276 .  | Age | 0.18780 | 0.06688 | 2.808 | 0.00499 **   | Yield | -0.02307 | 0.01416 | -1.629 | 0.10340    | ZNF296 | -6.55833 | 2.50249 | -2.621 | 0.00877 ** | <p><b>KLF2</b></p> <p>Coefficients:</p> <table border="1"> <thead> <tr> <th></th> <th>Estimate</th> <th>Std. Error</th> <th>z value</th> <th>Pr(&gt; z )</th> </tr> </thead> <tbody> <tr> <td>(Intercept)</td> <td>22.004445</td> <td>10.663263</td> <td>2.064</td> <td>0.03906 *</td> </tr> <tr> <td>Age</td> <td>0.181945</td> <td>0.062349</td> <td>2.918</td> <td>0.00352 **</td> </tr> <tr> <td>Yield</td> <td>-0.009706</td> <td>0.014790</td> <td>-0.656</td> <td>0.51165</td> </tr> <tr> <td>KLF2</td> <td>-6.244004</td> <td>2.476872</td> <td>-2.521</td> <td>0.01170 *</td> </tr> </tbody> </table> |  | Estimate | Std. Error | z value | Pr(> z ) | (Intercept) | 22.004445 | 10.663263 | 2.064  | 0.03906 * | Age | 0.181945 | 0.062349 | 2.918 | 0.00352 **   | Yield | -0.009706 | 0.014790 | -0.656 | 0.51165    | KLF2 | -6.244004 | 2.476872 | -2.521 | 0.01170 * |
|-------------------------------------------------------------------------------------------------------------------------------------------------------------------------------------------------------------------------------------------------------------------------------------------------------------------------------------------------------------------------------------------------------------------------------------------------------------------------------------------------------------------------------------------------------------------------------------------------------------|-----------|------------|------------|--------------|----------|-------------|----------|---------|--------|------------|-----|---------|---------|-------|--------------|-------|----------|---------|--------|------------|--------|----------|---------|--------|------------|----------------------------------------------------------------------------------------------------------------------------------------------------------------------------------------------------------------------------------------------------------------------------------------------------------------------------------------------------------------------------------------------------------------------------------------------------------------------------------------------------------------------------------------------------------------------------------------------------------------|--|----------|------------|---------|----------|-------------|-----------|-----------|--------|-----------|-----|----------|----------|-------|--------------|-------|-----------|----------|--------|------------|------|-----------|----------|--------|-----------|
|                                                                                                                                                                                                                                                                                                                                                                                                                                                                                                                                                                                                             | Estimate  | Std. Error | z value    | Pr(> z )     |          |             |          |         |        |            |     |         |         |       |              |       |          |         |        |            |        |          |         |        |            |                                                                                                                                                                                                                                                                                                                                                                                                                                                                                                                                                                                                                |  |          |            |         |          |             |           |           |        |           |     |          |          |       |              |       |           |          |        |            |      |           |          |        |           |
| (Intercept)                                                                                                                                                                                                                                                                                                                                                                                                                                                                                                                                                                                                 | 12.59263  | 6.76690    | 1.861      | 0.06276 .    |          |             |          |         |        |            |     |         |         |       |              |       |          |         |        |            |        |          |         |        |            |                                                                                                                                                                                                                                                                                                                                                                                                                                                                                                                                                                                                                |  |          |            |         |          |             |           |           |        |           |     |          |          |       |              |       |           |          |        |            |      |           |          |        |           |
| Age                                                                                                                                                                                                                                                                                                                                                                                                                                                                                                                                                                                                         | 0.18780   | 0.06688    | 2.808      | 0.00499 **   |          |             |          |         |        |            |     |         |         |       |              |       |          |         |        |            |        |          |         |        |            |                                                                                                                                                                                                                                                                                                                                                                                                                                                                                                                                                                                                                |  |          |            |         |          |             |           |           |        |           |     |          |          |       |              |       |           |          |        |            |      |           |          |        |           |
| Yield                                                                                                                                                                                                                                                                                                                                                                                                                                                                                                                                                                                                       | -0.02307  | 0.01416    | -1.629     | 0.10340      |          |             |          |         |        |            |     |         |         |       |              |       |          |         |        |            |        |          |         |        |            |                                                                                                                                                                                                                                                                                                                                                                                                                                                                                                                                                                                                                |  |          |            |         |          |             |           |           |        |           |     |          |          |       |              |       |           |          |        |            |      |           |          |        |           |
| ZNF296                                                                                                                                                                                                                                                                                                                                                                                                                                                                                                                                                                                                      | -6.55833  | 2.50249    | -2.621     | 0.00877 **   |          |             |          |         |        |            |     |         |         |       |              |       |          |         |        |            |        |          |         |        |            |                                                                                                                                                                                                                                                                                                                                                                                                                                                                                                                                                                                                                |  |          |            |         |          |             |           |           |        |           |     |          |          |       |              |       |           |          |        |            |      |           |          |        |           |
|                                                                                                                                                                                                                                                                                                                                                                                                                                                                                                                                                                                                             | Estimate  | Std. Error | z value    | Pr(> z )     |          |             |          |         |        |            |     |         |         |       |              |       |          |         |        |            |        |          |         |        |            |                                                                                                                                                                                                                                                                                                                                                                                                                                                                                                                                                                                                                |  |          |            |         |          |             |           |           |        |           |     |          |          |       |              |       |           |          |        |            |      |           |          |        |           |
| (Intercept)                                                                                                                                                                                                                                                                                                                                                                                                                                                                                                                                                                                                 | 22.004445 | 10.663263  | 2.064      | 0.03906 *    |          |             |          |         |        |            |     |         |         |       |              |       |          |         |        |            |        |          |         |        |            |                                                                                                                                                                                                                                                                                                                                                                                                                                                                                                                                                                                                                |  |          |            |         |          |             |           |           |        |           |     |          |          |       |              |       |           |          |        |            |      |           |          |        |           |
| Age                                                                                                                                                                                                                                                                                                                                                                                                                                                                                                                                                                                                         | 0.181945  | 0.062349   | 2.918      | 0.00352 **   |          |             |          |         |        |            |     |         |         |       |              |       |          |         |        |            |        |          |         |        |            |                                                                                                                                                                                                                                                                                                                                                                                                                                                                                                                                                                                                                |  |          |            |         |          |             |           |           |        |           |     |          |          |       |              |       |           |          |        |            |      |           |          |        |           |
| Yield                                                                                                                                                                                                                                                                                                                                                                                                                                                                                                                                                                                                       | -0.009706 | 0.014790   | -0.656     | 0.51165      |          |             |          |         |        |            |     |         |         |       |              |       |          |         |        |            |        |          |         |        |            |                                                                                                                                                                                                                                                                                                                                                                                                                                                                                                                                                                                                                |  |          |            |         |          |             |           |           |        |           |     |          |          |       |              |       |           |          |        |            |      |           |          |        |           |
| KLF2                                                                                                                                                                                                                                                                                                                                                                                                                                                                                                                                                                                                        | -6.244004 | 2.476872   | -2.521     | 0.01170 *    |          |             |          |         |        |            |     |         |         |       |              |       |          |         |        |            |        |          |         |        |            |                                                                                                                                                                                                                                                                                                                                                                                                                                                                                                                                                                                                                |  |          |            |         |          |             |           |           |        |           |     |          |          |       |              |       |           |          |        |            |      |           |          |        |           |
| <p><b>DUSP3</b></p> <p>Coefficients:</p> <table border="1"> <thead> <tr> <th></th> <th>Estimate</th> <th>Std. Error</th> <th>z value</th> <th>Pr(&gt; z )</th> </tr> </thead> <tbody> <tr> <td>(Intercept)</td> <td>2.75423</td> <td>4.05583</td> <td>0.679</td> <td>0.49709</td> </tr> <tr> <td>Age</td> <td>0.19326</td> <td>0.06700</td> <td>2.884</td> <td>0.00392 **</td> </tr> <tr> <td>Yield</td> <td>-0.01435</td> <td>0.01477</td> <td>-0.972</td> <td>0.33120</td> </tr> <tr> <td>DUSP3</td> <td>-4.30851</td> <td>2.07504</td> <td>-2.076</td> <td>0.03786 *</td> </tr> </tbody> </table>        |           | Estimate   | Std. Error | z value      | Pr(> z ) | (Intercept) | 2.75423  | 4.05583 | 0.679  | 0.49709    | Age | 0.19326 | 0.06700 | 2.884 | 0.00392 **   | Yield | -0.01435 | 0.01477 | -0.972 | 0.33120    | DUSP3  | -4.30851 | 2.07504 | -2.076 | 0.03786 *  | <p><b>ASUN</b></p> <p>Coefficients:</p> <table border="1"> <thead> <tr> <th></th> <th>Estimate</th> <th>Std. Error</th> <th>z value</th> <th>Pr(&gt; z )</th> </tr> </thead> <tbody> <tr> <td>(Intercept)</td> <td>6.08850</td> <td>5.86027</td> <td>1.039</td> <td>0.2988</td> </tr> <tr> <td>Age</td> <td>0.16679</td> <td>0.06785</td> <td>2.458</td> <td>0.0140 *</td> </tr> <tr> <td>Yield</td> <td>-0.01183</td> <td>0.01600</td> <td>-0.739</td> <td>0.4597</td> </tr> <tr> <td>ASUN</td> <td>-3.85017</td> <td>1.97943</td> <td>-1.945</td> <td>0.0518 .</td> </tr> </tbody> </table>                  |  | Estimate | Std. Error | z value | Pr(> z ) | (Intercept) | 6.08850   | 5.86027   | 1.039  | 0.2988    | Age | 0.16679  | 0.06785  | 2.458 | 0.0140 *     | Yield | -0.01183  | 0.01600  | -0.739 | 0.4597     | ASUN | -3.85017  | 1.97943  | -1.945 | 0.0518 .  |
|                                                                                                                                                                                                                                                                                                                                                                                                                                                                                                                                                                                                             | Estimate  | Std. Error | z value    | Pr(> z )     |          |             |          |         |        |            |     |         |         |       |              |       |          |         |        |            |        |          |         |        |            |                                                                                                                                                                                                                                                                                                                                                                                                                                                                                                                                                                                                                |  |          |            |         |          |             |           |           |        |           |     |          |          |       |              |       |           |          |        |            |      |           |          |        |           |
| (Intercept)                                                                                                                                                                                                                                                                                                                                                                                                                                                                                                                                                                                                 | 2.75423   | 4.05583    | 0.679      | 0.49709      |          |             |          |         |        |            |     |         |         |       |              |       |          |         |        |            |        |          |         |        |            |                                                                                                                                                                                                                                                                                                                                                                                                                                                                                                                                                                                                                |  |          |            |         |          |             |           |           |        |           |     |          |          |       |              |       |           |          |        |            |      |           |          |        |           |
| Age                                                                                                                                                                                                                                                                                                                                                                                                                                                                                                                                                                                                         | 0.19326   | 0.06700    | 2.884      | 0.00392 **   |          |             |          |         |        |            |     |         |         |       |              |       |          |         |        |            |        |          |         |        |            |                                                                                                                                                                                                                                                                                                                                                                                                                                                                                                                                                                                                                |  |          |            |         |          |             |           |           |        |           |     |          |          |       |              |       |           |          |        |            |      |           |          |        |           |
| Yield                                                                                                                                                                                                                                                                                                                                                                                                                                                                                                                                                                                                       | -0.01435  | 0.01477    | -0.972     | 0.33120      |          |             |          |         |        |            |     |         |         |       |              |       |          |         |        |            |        |          |         |        |            |                                                                                                                                                                                                                                                                                                                                                                                                                                                                                                                                                                                                                |  |          |            |         |          |             |           |           |        |           |     |          |          |       |              |       |           |          |        |            |      |           |          |        |           |
| DUSP3                                                                                                                                                                                                                                                                                                                                                                                                                                                                                                                                                                                                       | -4.30851  | 2.07504    | -2.076     | 0.03786 *    |          |             |          |         |        |            |     |         |         |       |              |       |          |         |        |            |        |          |         |        |            |                                                                                                                                                                                                                                                                                                                                                                                                                                                                                                                                                                                                                |  |          |            |         |          |             |           |           |        |           |     |          |          |       |              |       |           |          |        |            |      |           |          |        |           |
|                                                                                                                                                                                                                                                                                                                                                                                                                                                                                                                                                                                                             | Estimate  | Std. Error | z value    | Pr(> z )     |          |             |          |         |        |            |     |         |         |       |              |       |          |         |        |            |        |          |         |        |            |                                                                                                                                                                                                                                                                                                                                                                                                                                                                                                                                                                                                                |  |          |            |         |          |             |           |           |        |           |     |          |          |       |              |       |           |          |        |            |      |           |          |        |           |
| (Intercept)                                                                                                                                                                                                                                                                                                                                                                                                                                                                                                                                                                                                 | 6.08850   | 5.86027    | 1.039      | 0.2988       |          |             |          |         |        |            |     |         |         |       |              |       |          |         |        |            |        |          |         |        |            |                                                                                                                                                                                                                                                                                                                                                                                                                                                                                                                                                                                                                |  |          |            |         |          |             |           |           |        |           |     |          |          |       |              |       |           |          |        |            |      |           |          |        |           |
| Age                                                                                                                                                                                                                                                                                                                                                                                                                                                                                                                                                                                                         | 0.16679   | 0.06785    | 2.458      | 0.0140 *     |          |             |          |         |        |            |     |         |         |       |              |       |          |         |        |            |        |          |         |        |            |                                                                                                                                                                                                                                                                                                                                                                                                                                                                                                                                                                                                                |  |          |            |         |          |             |           |           |        |           |     |          |          |       |              |       |           |          |        |            |      |           |          |        |           |
| Yield                                                                                                                                                                                                                                                                                                                                                                                                                                                                                                                                                                                                       | -0.01183  | 0.01600    | -0.739     | 0.4597       |          |             |          |         |        |            |     |         |         |       |              |       |          |         |        |            |        |          |         |        |            |                                                                                                                                                                                                                                                                                                                                                                                                                                                                                                                                                                                                                |  |          |            |         |          |             |           |           |        |           |     |          |          |       |              |       |           |          |        |            |      |           |          |        |           |
| ASUN                                                                                                                                                                                                                                                                                                                                                                                                                                                                                                                                                                                                        | -3.85017  | 1.97943    | -1.945     | 0.0518 .     |          |             |          |         |        |            |     |         |         |       |              |       |          |         |        |            |        |          |         |        |            |                                                                                                                                                                                                                                                                                                                                                                                                                                                                                                                                                                                                                |  |          |            |         |          |             |           |           |        |           |     |          |          |       |              |       |           |          |        |            |      |           |          |        |           |
| <p><b>PTPRC</b></p> <p>Coefficients:</p> <table border="1"> <thead> <tr> <th></th> <th>Estimate</th> <th>Std. Error</th> <th>z value</th> <th>Pr(&gt; z )</th> </tr> </thead> <tbody> <tr> <td>(Intercept)</td> <td>8.29761</td> <td>7.96764</td> <td>1.041</td> <td>0.29768</td> </tr> <tr> <td>Age</td> <td>0.20138</td> <td>0.06681</td> <td>3.014</td> <td>0.00258 **</td> </tr> <tr> <td>Yield</td> <td>-0.02165</td> <td>0.01504</td> <td>-1.440</td> <td>0.14996</td> </tr> <tr> <td>PTPRC</td> <td>-3.10629</td> <td>1.86738</td> <td>-1.663</td> <td>0.09622 .</td> </tr> </tbody> </table>        |           | Estimate   | Std. Error | z value      | Pr(> z ) | (Intercept) | 8.29761  | 7.96764 | 1.041  | 0.29768    | Age | 0.20138 | 0.06681 | 3.014 | 0.00258 **   | Yield | -0.02165 | 0.01504 | -1.440 | 0.14996    | PTPRC  | -3.10629 | 1.86738 | -1.663 | 0.09622 .  | <p><b>NEMF</b></p> <p>Coefficients:</p> <table border="1"> <thead> <tr> <th></th> <th>Estimate</th> <th>Std. Error</th> <th>z value</th> <th>Pr(&gt; z )</th> </tr> </thead> <tbody> <tr> <td>(Intercept)</td> <td>6.15364</td> <td>7.11789</td> <td>0.865</td> <td>0.38730</td> </tr> <tr> <td>Age</td> <td>0.18838</td> <td>0.06734</td> <td>2.797</td> <td>0.00515 **</td> </tr> <tr> <td>Yield</td> <td>-0.01891</td> <td>0.01539</td> <td>-1.228</td> <td>0.21927</td> </tr> <tr> <td>NEMF</td> <td>-2.95622</td> <td>1.86340</td> <td>-1.586</td> <td>0.11263</td> </tr> </tbody> </table>               |  | Estimate | Std. Error | z value | Pr(> z ) | (Intercept) | 6.15364   | 7.11789   | 0.865  | 0.38730   | Age | 0.18838  | 0.06734  | 2.797 | 0.00515 **   | Yield | -0.01891  | 0.01539  | -1.228 | 0.21927    | NEMF | -2.95622  | 1.86340  | -1.586 | 0.11263   |
|                                                                                                                                                                                                                                                                                                                                                                                                                                                                                                                                                                                                             | Estimate  | Std. Error | z value    | Pr(> z )     |          |             |          |         |        |            |     |         |         |       |              |       |          |         |        |            |        |          |         |        |            |                                                                                                                                                                                                                                                                                                                                                                                                                                                                                                                                                                                                                |  |          |            |         |          |             |           |           |        |           |     |          |          |       |              |       |           |          |        |            |      |           |          |        |           |
| (Intercept)                                                                                                                                                                                                                                                                                                                                                                                                                                                                                                                                                                                                 | 8.29761   | 7.96764    | 1.041      | 0.29768      |          |             |          |         |        |            |     |         |         |       |              |       |          |         |        |            |        |          |         |        |            |                                                                                                                                                                                                                                                                                                                                                                                                                                                                                                                                                                                                                |  |          |            |         |          |             |           |           |        |           |     |          |          |       |              |       |           |          |        |            |      |           |          |        |           |
| Age                                                                                                                                                                                                                                                                                                                                                                                                                                                                                                                                                                                                         | 0.20138   | 0.06681    | 3.014      | 0.00258 **   |          |             |          |         |        |            |     |         |         |       |              |       |          |         |        |            |        |          |         |        |            |                                                                                                                                                                                                                                                                                                                                                                                                                                                                                                                                                                                                                |  |          |            |         |          |             |           |           |        |           |     |          |          |       |              |       |           |          |        |            |      |           |          |        |           |
| Yield                                                                                                                                                                                                                                                                                                                                                                                                                                                                                                                                                                                                       | -0.02165  | 0.01504    | -1.440     | 0.14996      |          |             |          |         |        |            |     |         |         |       |              |       |          |         |        |            |        |          |         |        |            |                                                                                                                                                                                                                                                                                                                                                                                                                                                                                                                                                                                                                |  |          |            |         |          |             |           |           |        |           |     |          |          |       |              |       |           |          |        |            |      |           |          |        |           |
| PTPRC                                                                                                                                                                                                                                                                                                                                                                                                                                                                                                                                                                                                       | -3.10629  | 1.86738    | -1.663     | 0.09622 .    |          |             |          |         |        |            |     |         |         |       |              |       |          |         |        |            |        |          |         |        |            |                                                                                                                                                                                                                                                                                                                                                                                                                                                                                                                                                                                                                |  |          |            |         |          |             |           |           |        |           |     |          |          |       |              |       |           |          |        |            |      |           |          |        |           |
|                                                                                                                                                                                                                                                                                                                                                                                                                                                                                                                                                                                                             | Estimate  | Std. Error | z value    | Pr(> z )     |          |             |          |         |        |            |     |         |         |       |              |       |          |         |        |            |        |          |         |        |            |                                                                                                                                                                                                                                                                                                                                                                                                                                                                                                                                                                                                                |  |          |            |         |          |             |           |           |        |           |     |          |          |       |              |       |           |          |        |            |      |           |          |        |           |
| (Intercept)                                                                                                                                                                                                                                                                                                                                                                                                                                                                                                                                                                                                 | 6.15364   | 7.11789    | 0.865      | 0.38730      |          |             |          |         |        |            |     |         |         |       |              |       |          |         |        |            |        |          |         |        |            |                                                                                                                                                                                                                                                                                                                                                                                                                                                                                                                                                                                                                |  |          |            |         |          |             |           |           |        |           |     |          |          |       |              |       |           |          |        |            |      |           |          |        |           |
| Age                                                                                                                                                                                                                                                                                                                                                                                                                                                                                                                                                                                                         | 0.18838   | 0.06734    | 2.797      | 0.00515 **   |          |             |          |         |        |            |     |         |         |       |              |       |          |         |        |            |        |          |         |        |            |                                                                                                                                                                                                                                                                                                                                                                                                                                                                                                                                                                                                                |  |          |            |         |          |             |           |           |        |           |     |          |          |       |              |       |           |          |        |            |      |           |          |        |           |
| Yield                                                                                                                                                                                                                                                                                                                                                                                                                                                                                                                                                                                                       | -0.01891  | 0.01539    | -1.228     | 0.21927      |          |             |          |         |        |            |     |         |         |       |              |       |          |         |        |            |        |          |         |        |            |                                                                                                                                                                                                                                                                                                                                                                                                                                                                                                                                                                                                                |  |          |            |         |          |             |           |           |        |           |     |          |          |       |              |       |           |          |        |            |      |           |          |        |           |
| NEMF                                                                                                                                                                                                                                                                                                                                                                                                                                                                                                                                                                                                        | -2.95622  | 1.86340    | -1.586     | 0.11263      |          |             |          |         |        |            |     |         |         |       |              |       |          |         |        |            |        |          |         |        |            |                                                                                                                                                                                                                                                                                                                                                                                                                                                                                                                                                                                                                |  |          |            |         |          |             |           |           |        |           |     |          |          |       |              |       |           |          |        |            |      |           |          |        |           |
| <p><b>GBP5</b></p> <p>Coefficients:</p> <table border="1"> <thead> <tr> <th></th> <th>Estimate</th> <th>Std. Error</th> <th>z value</th> <th>Pr(&gt; z )</th> </tr> </thead> <tbody> <tr> <td>(Intercept)</td> <td>1.94224</td> <td>4.39863</td> <td>0.442</td> <td>0.65881</td> </tr> <tr> <td>Age</td> <td>0.21210</td> <td>0.06513</td> <td>3.256</td> <td>0.00113 **</td> </tr> <tr> <td>Yield</td> <td>-0.01989</td> <td>0.01504</td> <td>-1.322</td> <td>0.18602</td> </tr> <tr> <td>GBP5</td> <td>-2.53349</td> <td>1.50473</td> <td>-1.684</td> <td>0.09224 .</td> </tr> </tbody> </table>          |           | Estimate   | Std. Error | z value      | Pr(> z ) | (Intercept) | 1.94224  | 4.39863 | 0.442  | 0.65881    | Age | 0.21210 | 0.06513 | 3.256 | 0.00113 **   | Yield | -0.01989 | 0.01504 | -1.322 | 0.18602    | GBP5   | -2.53349 | 1.50473 | -1.684 | 0.09224 .  | <p><b>GBP6</b></p> <p>Coefficients:</p> <table border="1"> <thead> <tr> <th></th> <th>Estimate</th> <th>Std. Error</th> <th>z value</th> <th>Pr(&gt; z )</th> </tr> </thead> <tbody> <tr> <td>(Intercept)</td> <td>-1.84614</td> <td>2.99697</td> <td>-0.616</td> <td>0.53789</td> </tr> <tr> <td>Age</td> <td>0.21200</td> <td>0.06693</td> <td>3.167</td> <td>0.00154 **</td> </tr> <tr> <td>Yield</td> <td>-0.02824</td> <td>0.01445</td> <td>-1.955</td> <td>0.05058 .</td> </tr> <tr> <td>GBP6</td> <td>-1.31439</td> <td>1.08122</td> <td>-1.216</td> <td>0.22412</td> </tr> </tbody> </table>           |  | Estimate | Std. Error | z value | Pr(> z ) | (Intercept) | -1.84614  | 2.99697   | -0.616 | 0.53789   | Age | 0.21200  | 0.06693  | 3.167 | 0.00154 **   | Yield | -0.02824  | 0.01445  | -1.955 | 0.05058 .  | GBP6 | -1.31439  | 1.08122  | -1.216 | 0.22412   |
|                                                                                                                                                                                                                                                                                                                                                                                                                                                                                                                                                                                                             | Estimate  | Std. Error | z value    | Pr(> z )     |          |             |          |         |        |            |     |         |         |       |              |       |          |         |        |            |        |          |         |        |            |                                                                                                                                                                                                                                                                                                                                                                                                                                                                                                                                                                                                                |  |          |            |         |          |             |           |           |        |           |     |          |          |       |              |       |           |          |        |            |      |           |          |        |           |
| (Intercept)                                                                                                                                                                                                                                                                                                                                                                                                                                                                                                                                                                                                 | 1.94224   | 4.39863    | 0.442      | 0.65881      |          |             |          |         |        |            |     |         |         |       |              |       |          |         |        |            |        |          |         |        |            |                                                                                                                                                                                                                                                                                                                                                                                                                                                                                                                                                                                                                |  |          |            |         |          |             |           |           |        |           |     |          |          |       |              |       |           |          |        |            |      |           |          |        |           |
| Age                                                                                                                                                                                                                                                                                                                                                                                                                                                                                                                                                                                                         | 0.21210   | 0.06513    | 3.256      | 0.00113 **   |          |             |          |         |        |            |     |         |         |       |              |       |          |         |        |            |        |          |         |        |            |                                                                                                                                                                                                                                                                                                                                                                                                                                                                                                                                                                                                                |  |          |            |         |          |             |           |           |        |           |     |          |          |       |              |       |           |          |        |            |      |           |          |        |           |
| Yield                                                                                                                                                                                                                                                                                                                                                                                                                                                                                                                                                                                                       | -0.01989  | 0.01504    | -1.322     | 0.18602      |          |             |          |         |        |            |     |         |         |       |              |       |          |         |        |            |        |          |         |        |            |                                                                                                                                                                                                                                                                                                                                                                                                                                                                                                                                                                                                                |  |          |            |         |          |             |           |           |        |           |     |          |          |       |              |       |           |          |        |            |      |           |          |        |           |
| GBP5                                                                                                                                                                                                                                                                                                                                                                                                                                                                                                                                                                                                        | -2.53349  | 1.50473    | -1.684     | 0.09224 .    |          |             |          |         |        |            |     |         |         |       |              |       |          |         |        |            |        |          |         |        |            |                                                                                                                                                                                                                                                                                                                                                                                                                                                                                                                                                                                                                |  |          |            |         |          |             |           |           |        |           |     |          |          |       |              |       |           |          |        |            |      |           |          |        |           |
|                                                                                                                                                                                                                                                                                                                                                                                                                                                                                                                                                                                                             | Estimate  | Std. Error | z value    | Pr(> z )     |          |             |          |         |        |            |     |         |         |       |              |       |          |         |        |            |        |          |         |        |            |                                                                                                                                                                                                                                                                                                                                                                                                                                                                                                                                                                                                                |  |          |            |         |          |             |           |           |        |           |     |          |          |       |              |       |           |          |        |            |      |           |          |        |           |
| (Intercept)                                                                                                                                                                                                                                                                                                                                                                                                                                                                                                                                                                                                 | -1.84614  | 2.99697    | -0.616     | 0.53789      |          |             |          |         |        |            |     |         |         |       |              |       |          |         |        |            |        |          |         |        |            |                                                                                                                                                                                                                                                                                                                                                                                                                                                                                                                                                                                                                |  |          |            |         |          |             |           |           |        |           |     |          |          |       |              |       |           |          |        |            |      |           |          |        |           |
| Age                                                                                                                                                                                                                                                                                                                                                                                                                                                                                                                                                                                                         | 0.21200   | 0.06693    | 3.167      | 0.00154 **   |          |             |          |         |        |            |     |         |         |       |              |       |          |         |        |            |        |          |         |        |            |                                                                                                                                                                                                                                                                                                                                                                                                                                                                                                                                                                                                                |  |          |            |         |          |             |           |           |        |           |     |          |          |       |              |       |           |          |        |            |      |           |          |        |           |
| Yield                                                                                                                                                                                                                                                                                                                                                                                                                                                                                                                                                                                                       | -0.02824  | 0.01445    | -1.955     | 0.05058 .    |          |             |          |         |        |            |     |         |         |       |              |       |          |         |        |            |        |          |         |        |            |                                                                                                                                                                                                                                                                                                                                                                                                                                                                                                                                                                                                                |  |          |            |         |          |             |           |           |        |           |     |          |          |       |              |       |           |          |        |            |      |           |          |        |           |
| GBP6                                                                                                                                                                                                                                                                                                                                                                                                                                                                                                                                                                                                        | -1.31439  | 1.08122    | -1.216     | 0.22412      |          |             |          |         |        |            |     |         |         |       |              |       |          |         |        |            |        |          |         |        |            |                                                                                                                                                                                                                                                                                                                                                                                                                                                                                                                                                                                                                |  |          |            |         |          |             |           |           |        |           |     |          |          |       |              |       |           |          |        |            |      |           |          |        |           |
| <p><b>DHX29</b></p> <p>Coefficients:</p> <table border="1"> <thead> <tr> <th></th> <th>Estimate</th> <th>Std. Error</th> <th>z value</th> <th>Pr(&gt; z )</th> </tr> </thead> <tbody> <tr> <td>(Intercept)</td> <td>-3.36997</td> <td>5.46804</td> <td>-0.616</td> <td>0.53769</td> </tr> <tr> <td>Age</td> <td>0.22127</td> <td>0.06868</td> <td>3.222</td> <td>0.00127 **</td> </tr> <tr> <td>Yield</td> <td>-0.03152</td> <td>0.01988</td> <td>-1.586</td> <td>0.11277</td> </tr> <tr> <td>DHX29</td> <td>-0.58448</td> <td>2.07421</td> <td>-0.282</td> <td>0.77811</td> </tr> </tbody> </table>        |           | Estimate   | Std. Error | z value      | Pr(> z ) | (Intercept) | -3.36997 | 5.46804 | -0.616 | 0.53769    | Age | 0.22127 | 0.06868 | 3.222 | 0.00127 **   | Yield | -0.03152 | 0.01988 | -1.586 | 0.11277    | DHX29  | -0.58448 | 2.07421 | -0.282 | 0.77811    | <p><b>ARG1</b></p> <p>Coefficients:</p> <table border="1"> <thead> <tr> <th></th> <th>Estimate</th> <th>Std. Error</th> <th>z value</th> <th>Pr(&gt; z )</th> </tr> </thead> <tbody> <tr> <td>(Intercept)</td> <td>-0.22776</td> <td>6.11330</td> <td>-0.037</td> <td>0.970280</td> </tr> <tr> <td>Age</td> <td>0.22150</td> <td>0.06532</td> <td>3.391</td> <td>0.000696 ***</td> </tr> <tr> <td>Yield</td> <td>-0.02585</td> <td>0.01807</td> <td>-1.430</td> <td>0.152718</td> </tr> <tr> <td>ARG1</td> <td>-1.53070</td> <td>1.98337</td> <td>-0.772</td> <td>0.440254</td> </tr> </tbody> </table>        |  | Estimate | Std. Error | z value | Pr(> z ) | (Intercept) | -0.22776  | 6.11330   | -0.037 | 0.970280  | Age | 0.22150  | 0.06532  | 3.391 | 0.000696 *** | Yield | -0.02585  | 0.01807  | -1.430 | 0.152718   | ARG1 | -1.53070  | 1.98337  | -0.772 | 0.440254  |
|                                                                                                                                                                                                                                                                                                                                                                                                                                                                                                                                                                                                             | Estimate  | Std. Error | z value    | Pr(> z )     |          |             |          |         |        |            |     |         |         |       |              |       |          |         |        |            |        |          |         |        |            |                                                                                                                                                                                                                                                                                                                                                                                                                                                                                                                                                                                                                |  |          |            |         |          |             |           |           |        |           |     |          |          |       |              |       |           |          |        |            |      |           |          |        |           |
| (Intercept)                                                                                                                                                                                                                                                                                                                                                                                                                                                                                                                                                                                                 | -3.36997  | 5.46804    | -0.616     | 0.53769      |          |             |          |         |        |            |     |         |         |       |              |       |          |         |        |            |        |          |         |        |            |                                                                                                                                                                                                                                                                                                                                                                                                                                                                                                                                                                                                                |  |          |            |         |          |             |           |           |        |           |     |          |          |       |              |       |           |          |        |            |      |           |          |        |           |
| Age                                                                                                                                                                                                                                                                                                                                                                                                                                                                                                                                                                                                         | 0.22127   | 0.06868    | 3.222      | 0.00127 **   |          |             |          |         |        |            |     |         |         |       |              |       |          |         |        |            |        |          |         |        |            |                                                                                                                                                                                                                                                                                                                                                                                                                                                                                                                                                                                                                |  |          |            |         |          |             |           |           |        |           |     |          |          |       |              |       |           |          |        |            |      |           |          |        |           |
| Yield                                                                                                                                                                                                                                                                                                                                                                                                                                                                                                                                                                                                       | -0.03152  | 0.01988    | -1.586     | 0.11277      |          |             |          |         |        |            |     |         |         |       |              |       |          |         |        |            |        |          |         |        |            |                                                                                                                                                                                                                                                                                                                                                                                                                                                                                                                                                                                                                |  |          |            |         |          |             |           |           |        |           |     |          |          |       |              |       |           |          |        |            |      |           |          |        |           |
| DHX29                                                                                                                                                                                                                                                                                                                                                                                                                                                                                                                                                                                                       | -0.58448  | 2.07421    | -0.282     | 0.77811      |          |             |          |         |        |            |     |         |         |       |              |       |          |         |        |            |        |          |         |        |            |                                                                                                                                                                                                                                                                                                                                                                                                                                                                                                                                                                                                                |  |          |            |         |          |             |           |           |        |           |     |          |          |       |              |       |           |          |        |            |      |           |          |        |           |
|                                                                                                                                                                                                                                                                                                                                                                                                                                                                                                                                                                                                             | Estimate  | Std. Error | z value    | Pr(> z )     |          |             |          |         |        |            |     |         |         |       |              |       |          |         |        |            |        |          |         |        |            |                                                                                                                                                                                                                                                                                                                                                                                                                                                                                                                                                                                                                |  |          |            |         |          |             |           |           |        |           |     |          |          |       |              |       |           |          |        |            |      |           |          |        |           |
| (Intercept)                                                                                                                                                                                                                                                                                                                                                                                                                                                                                                                                                                                                 | -0.22776  | 6.11330    | -0.037     | 0.970280     |          |             |          |         |        |            |     |         |         |       |              |       |          |         |        |            |        |          |         |        |            |                                                                                                                                                                                                                                                                                                                                                                                                                                                                                                                                                                                                                |  |          |            |         |          |             |           |           |        |           |     |          |          |       |              |       |           |          |        |            |      |           |          |        |           |
| Age                                                                                                                                                                                                                                                                                                                                                                                                                                                                                                                                                                                                         | 0.22150   | 0.06532    | 3.391      | 0.000696 *** |          |             |          |         |        |            |     |         |         |       |              |       |          |         |        |            |        |          |         |        |            |                                                                                                                                                                                                                                                                                                                                                                                                                                                                                                                                                                                                                |  |          |            |         |          |             |           |           |        |           |     |          |          |       |              |       |           |          |        |            |      |           |          |        |           |
| Yield                                                                                                                                                                                                                                                                                                                                                                                                                                                                                                                                                                                                       | -0.02585  | 0.01807    | -1.430     | 0.152718     |          |             |          |         |        |            |     |         |         |       |              |       |          |         |        |            |        |          |         |        |            |                                                                                                                                                                                                                                                                                                                                                                                                                                                                                                                                                                                                                |  |          |            |         |          |             |           |           |        |           |     |          |          |       |              |       |           |          |        |            |      |           |          |        |           |
| ARG1                                                                                                                                                                                                                                                                                                                                                                                                                                                                                                                                                                                                        | -1.53070  | 1.98337    | -0.772     | 0.440254     |          |             |          |         |        |            |     |         |         |       |              |       |          |         |        |            |        |          |         |        |            |                                                                                                                                                                                                                                                                                                                                                                                                                                                                                                                                                                                                                |  |          |            |         |          |             |           |           |        |           |     |          |          |       |              |       |           |          |        |            |      |           |          |        |           |
| <p><b>C1QB</b></p> <p>Coefficients:</p> <table border="1"> <thead> <tr> <th></th> <th>Estimate</th> <th>Std. Error</th> <th>z value</th> <th>Pr(&gt; z )</th> </tr> </thead> <tbody> <tr> <td>(Intercept)</td> <td>-3.66667</td> <td>2.22831</td> <td>-1.645</td> <td>0.09987 .</td> </tr> <tr> <td>Age</td> <td>0.21626</td> <td>0.06576</td> <td>3.289</td> <td>0.00101 **</td> </tr> <tr> <td>Yield</td> <td>-0.03176</td> <td>0.01386</td> <td>-2.291</td> <td>0.02198 *</td> </tr> <tr> <td>C1QB</td> <td>-0.59814</td> <td>0.53644</td> <td>-1.115</td> <td>0.26484</td> </tr> </tbody> </table>      |           | Estimate   | Std. Error | z value      | Pr(> z ) | (Intercept) | -3.66667 | 2.22831 | -1.645 | 0.09987 .  | Age | 0.21626 | 0.06576 | 3.289 | 0.00101 **   | Yield | -0.03176 | 0.01386 | -2.291 | 0.02198 *  | C1QB   | -0.59814 | 0.53644 | -1.115 | 0.26484    | <p><b>GAS6</b></p> <p>Coefficients:</p> <table border="1"> <thead> <tr> <th></th> <th>Estimate</th> <th>Std. Error</th> <th>z value</th> <th>Pr(&gt; z )</th> </tr> </thead> <tbody> <tr> <td>(Intercept)</td> <td>-3.90153</td> <td>2.34441</td> <td>-1.664</td> <td>0.09608 .</td> </tr> <tr> <td>Age</td> <td>0.21722</td> <td>0.06692</td> <td>3.246</td> <td>0.00117 **</td> </tr> <tr> <td>Yield</td> <td>-0.03265</td> <td>0.01419</td> <td>-2.301</td> <td>0.02141 *</td> </tr> <tr> <td>GAS6</td> <td>-0.47151</td> <td>0.66248</td> <td>-0.712</td> <td>0.47663</td> </tr> </tbody> </table>         |  | Estimate | Std. Error | z value | Pr(> z ) | (Intercept) | -3.90153  | 2.34441   | -1.664 | 0.09608 . | Age | 0.21722  | 0.06692  | 3.246 | 0.00117 **   | Yield | -0.03265  | 0.01419  | -2.301 | 0.02141 *  | GAS6 | -0.47151  | 0.66248  | -0.712 | 0.47663   |
|                                                                                                                                                                                                                                                                                                                                                                                                                                                                                                                                                                                                             | Estimate  | Std. Error | z value    | Pr(> z )     |          |             |          |         |        |            |     |         |         |       |              |       |          |         |        |            |        |          |         |        |            |                                                                                                                                                                                                                                                                                                                                                                                                                                                                                                                                                                                                                |  |          |            |         |          |             |           |           |        |           |     |          |          |       |              |       |           |          |        |            |      |           |          |        |           |
| (Intercept)                                                                                                                                                                                                                                                                                                                                                                                                                                                                                                                                                                                                 | -3.66667  | 2.22831    | -1.645     | 0.09987 .    |          |             |          |         |        |            |     |         |         |       |              |       |          |         |        |            |        |          |         |        |            |                                                                                                                                                                                                                                                                                                                                                                                                                                                                                                                                                                                                                |  |          |            |         |          |             |           |           |        |           |     |          |          |       |              |       |           |          |        |            |      |           |          |        |           |
| Age                                                                                                                                                                                                                                                                                                                                                                                                                                                                                                                                                                                                         | 0.21626   | 0.06576    | 3.289      | 0.00101 **   |          |             |          |         |        |            |     |         |         |       |              |       |          |         |        |            |        |          |         |        |            |                                                                                                                                                                                                                                                                                                                                                                                                                                                                                                                                                                                                                |  |          |            |         |          |             |           |           |        |           |     |          |          |       |              |       |           |          |        |            |      |           |          |        |           |
| Yield                                                                                                                                                                                                                                                                                                                                                                                                                                                                                                                                                                                                       | -0.03176  | 0.01386    | -2.291     | 0.02198 *    |          |             |          |         |        |            |     |         |         |       |              |       |          |         |        |            |        |          |         |        |            |                                                                                                                                                                                                                                                                                                                                                                                                                                                                                                                                                                                                                |  |          |            |         |          |             |           |           |        |           |     |          |          |       |              |       |           |          |        |            |      |           |          |        |           |
| C1QB                                                                                                                                                                                                                                                                                                                                                                                                                                                                                                                                                                                                        | -0.59814  | 0.53644    | -1.115     | 0.26484      |          |             |          |         |        |            |     |         |         |       |              |       |          |         |        |            |        |          |         |        |            |                                                                                                                                                                                                                                                                                                                                                                                                                                                                                                                                                                                                                |  |          |            |         |          |             |           |           |        |           |     |          |          |       |              |       |           |          |        |            |      |           |          |        |           |
|                                                                                                                                                                                                                                                                                                                                                                                                                                                                                                                                                                                                             | Estimate  | Std. Error | z value    | Pr(> z )     |          |             |          |         |        |            |     |         |         |       |              |       |          |         |        |            |        |          |         |        |            |                                                                                                                                                                                                                                                                                                                                                                                                                                                                                                                                                                                                                |  |          |            |         |          |             |           |           |        |           |     |          |          |       |              |       |           |          |        |            |      |           |          |        |           |
| (Intercept)                                                                                                                                                                                                                                                                                                                                                                                                                                                                                                                                                                                                 | -3.90153  | 2.34441    | -1.664     | 0.09608 .    |          |             |          |         |        |            |     |         |         |       |              |       |          |         |        |            |        |          |         |        |            |                                                                                                                                                                                                                                                                                                                                                                                                                                                                                                                                                                                                                |  |          |            |         |          |             |           |           |        |           |     |          |          |       |              |       |           |          |        |            |      |           |          |        |           |
| Age                                                                                                                                                                                                                                                                                                                                                                                                                                                                                                                                                                                                         | 0.21722   | 0.06692    | 3.246      | 0.00117 **   |          |             |          |         |        |            |     |         |         |       |              |       |          |         |        |            |        |          |         |        |            |                                                                                                                                                                                                                                                                                                                                                                                                                                                                                                                                                                                                                |  |          |            |         |          |             |           |           |        |           |     |          |          |       |              |       |           |          |        |            |      |           |          |        |           |
| Yield                                                                                                                                                                                                                                                                                                                                                                                                                                                                                                                                                                                                       | -0.03265  | 0.01419    | -2.301     | 0.02141 *    |          |             |          |         |        |            |     |         |         |       |              |       |          |         |        |            |        |          |         |        |            |                                                                                                                                                                                                                                                                                                                                                                                                                                                                                                                                                                                                                |  |          |            |         |          |             |           |           |        |           |     |          |          |       |              |       |           |          |        |            |      |           |          |        |           |
| GAS6                                                                                                                                                                                                                                                                                                                                                                                                                                                                                                                                                                                                        | -0.47151  | 0.66248    | -0.712     | 0.47663      |          |             |          |         |        |            |     |         |         |       |              |       |          |         |        |            |        |          |         |        |            |                                                                                                                                                                                                                                                                                                                                                                                                                                                                                                                                                                                                                |  |          |            |         |          |             |           |           |        |           |     |          |          |       |              |       |           |          |        |            |      |           |          |        |           |
| <p><b>BATF2</b></p> <p>Coefficients:</p> <table border="1"> <thead> <tr> <th></th> <th>Estimate</th> <th>Std. Error</th> <th>z value</th> <th>Pr(&gt; z )</th> </tr> </thead> <tbody> <tr> <td>(Intercept)</td> <td>-5.74307</td> <td>2.70646</td> <td>-2.122</td> <td>0.033839 *</td> </tr> <tr> <td>Age</td> <td>0.23151</td> <td>0.06721</td> <td>3.445</td> <td>0.000572 ***</td> </tr> <tr> <td>Yield</td> <td>-0.03897</td> <td>0.01538</td> <td>-2.534</td> <td>0.011267 *</td> </tr> <tr> <td>BATF2</td> <td>0.36705</td> <td>0.68572</td> <td>0.535</td> <td>0.592457</td> </tr> </tbody> </table> |           | Estimate   | Std. Error | z value      | Pr(> z ) | (Intercept) | -5.74307 | 2.70646 | -2.122 | 0.033839 * | Age | 0.23151 | 0.06721 | 3.445 | 0.000572 *** | Yield | -0.03897 | 0.01538 | -2.534 | 0.011267 * | BATF2  | 0.36705  | 0.68572 | 0.535  | 0.592457   | <p><b>CD64</b></p> <p>Coefficients:</p> <table border="1"> <thead> <tr> <th></th> <th>Estimate</th> <th>Std. Error</th> <th>z value</th> <th>Pr(&gt; z )</th> </tr> </thead> <tbody> <tr> <td>(Intercept)</td> <td>-4.52905</td> <td>3.83578</td> <td>-1.181</td> <td>0.237708</td> </tr> <tr> <td>Age</td> <td>0.22635</td> <td>0.06646</td> <td>3.406</td> <td>0.000659 ***</td> </tr> <tr> <td>Yield</td> <td>-0.03502</td> <td>0.01576</td> <td>-2.222</td> <td>0.026282 *</td> </tr> <tr> <td>CD64</td> <td>-0.10766</td> <td>1.24191</td> <td>-0.087</td> <td>0.930919</td> </tr> </tbody> </table>      |  | Estimate | Std. Error | z value | Pr(> z ) | (Intercept) | -4.52905  | 3.83578   | -1.181 | 0.237708  | Age | 0.22635  | 0.06646  | 3.406 | 0.000659 *** | Yield | -0.03502  | 0.01576  | -2.222 | 0.026282 * | CD64 | -0.10766  | 1.24191  | -0.087 | 0.930919  |
|                                                                                                                                                                                                                                                                                                                                                                                                                                                                                                                                                                                                             | Estimate  | Std. Error | z value    | Pr(> z )     |          |             |          |         |        |            |     |         |         |       |              |       |          |         |        |            |        |          |         |        |            |                                                                                                                                                                                                                                                                                                                                                                                                                                                                                                                                                                                                                |  |          |            |         |          |             |           |           |        |           |     |          |          |       |              |       |           |          |        |            |      |           |          |        |           |
| (Intercept)                                                                                                                                                                                                                                                                                                                                                                                                                                                                                                                                                                                                 | -5.74307  | 2.70646    | -2.122     | 0.033839 *   |          |             |          |         |        |            |     |         |         |       |              |       |          |         |        |            |        |          |         |        |            |                                                                                                                                                                                                                                                                                                                                                                                                                                                                                                                                                                                                                |  |          |            |         |          |             |           |           |        |           |     |          |          |       |              |       |           |          |        |            |      |           |          |        |           |
| Age                                                                                                                                                                                                                                                                                                                                                                                                                                                                                                                                                                                                         | 0.23151   | 0.06721    | 3.445      | 0.000572 *** |          |             |          |         |        |            |     |         |         |       |              |       |          |         |        |            |        |          |         |        |            |                                                                                                                                                                                                                                                                                                                                                                                                                                                                                                                                                                                                                |  |          |            |         |          |             |           |           |        |           |     |          |          |       |              |       |           |          |        |            |      |           |          |        |           |
| Yield                                                                                                                                                                                                                                                                                                                                                                                                                                                                                                                                                                                                       | -0.03897  | 0.01538    | -2.534     | 0.011267 *   |          |             |          |         |        |            |     |         |         |       |              |       |          |         |        |            |        |          |         |        |            |                                                                                                                                                                                                                                                                                                                                                                                                                                                                                                                                                                                                                |  |          |            |         |          |             |           |           |        |           |     |          |          |       |              |       |           |          |        |            |      |           |          |        |           |
| BATF2                                                                                                                                                                                                                                                                                                                                                                                                                                                                                                                                                                                                       | 0.36705   | 0.68572    | 0.535      | 0.592457     |          |             |          |         |        |            |     |         |         |       |              |       |          |         |        |            |        |          |         |        |            |                                                                                                                                                                                                                                                                                                                                                                                                                                                                                                                                                                                                                |  |          |            |         |          |             |           |           |        |           |     |          |          |       |              |       |           |          |        |            |      |           |          |        |           |
|                                                                                                                                                                                                                                                                                                                                                                                                                                                                                                                                                                                                             | Estimate  | Std. Error | z value    | Pr(> z )     |          |             |          |         |        |            |     |         |         |       |              |       |          |         |        |            |        |          |         |        |            |                                                                                                                                                                                                                                                                                                                                                                                                                                                                                                                                                                                                                |  |          |            |         |          |             |           |           |        |           |     |          |          |       |              |       |           |          |        |            |      |           |          |        |           |
| (Intercept)                                                                                                                                                                                                                                                                                                                                                                                                                                                                                                                                                                                                 | -4.52905  | 3.83578    | -1.181     | 0.237708     |          |             |          |         |        |            |     |         |         |       |              |       |          |         |        |            |        |          |         |        |            |                                                                                                                                                                                                                                                                                                                                                                                                                                                                                                                                                                                                                |  |          |            |         |          |             |           |           |        |           |     |          |          |       |              |       |           |          |        |            |      |           |          |        |           |
| Age                                                                                                                                                                                                                                                                                                                                                                                                                                                                                                                                                                                                         | 0.22635   | 0.06646    | 3.406      | 0.000659 *** |          |             |          |         |        |            |     |         |         |       |              |       |          |         |        |            |        |          |         |        |            |                                                                                                                                                                                                                                                                                                                                                                                                                                                                                                                                                                                                                |  |          |            |         |          |             |           |           |        |           |     |          |          |       |              |       |           |          |        |            |      |           |          |        |           |
| Yield                                                                                                                                                                                                                                                                                                                                                                                                                                                                                                                                                                                                       | -0.03502  | 0.01576    | -2.222     | 0.026282 *   |          |             |          |         |        |            |     |         |         |       |              |       |          |         |        |            |        |          |         |        |            |                                                                                                                                                                                                                                                                                                                                                                                                                                                                                                                                                                                                                |  |          |            |         |          |             |           |           |        |           |     |          |          |       |              |       |           |          |        |            |      |           |          |        |           |
| CD64                                                                                                                                                                                                                                                                                                                                                                                                                                                                                                                                                                                                        | -0.10766  | 1.24191    | -0.087     | 0.930919     |          |             |          |         |        |            |     |         |         |       |              |       |          |         |        |            |        |          |         |        |            |                                                                                                                                                                                                                                                                                                                                                                                                                                                                                                                                                                                                                |  |          |            |         |          |             |           |           |        |           |     |          |          |       |              |       |           |          |        |            |      |           |          |        |           |

### Supplementary analysis 3: Linearity Assumptions evaluations

#### Residual linearity analysis

Further model check analysis to confirm that linearity assumptions were met was performed.

Both quadratic and smoother-based curves were fitted to the residual plots. Both the model with *ZNF296* (Model 1) and *KLF2* (Model 2) met the assumptions of linearity meaning that the covariates response is explained in a linear form since they align on the link scale thus no transformation of the data was required. Also, the test statistics for their coefficients were small and nonsignificant.

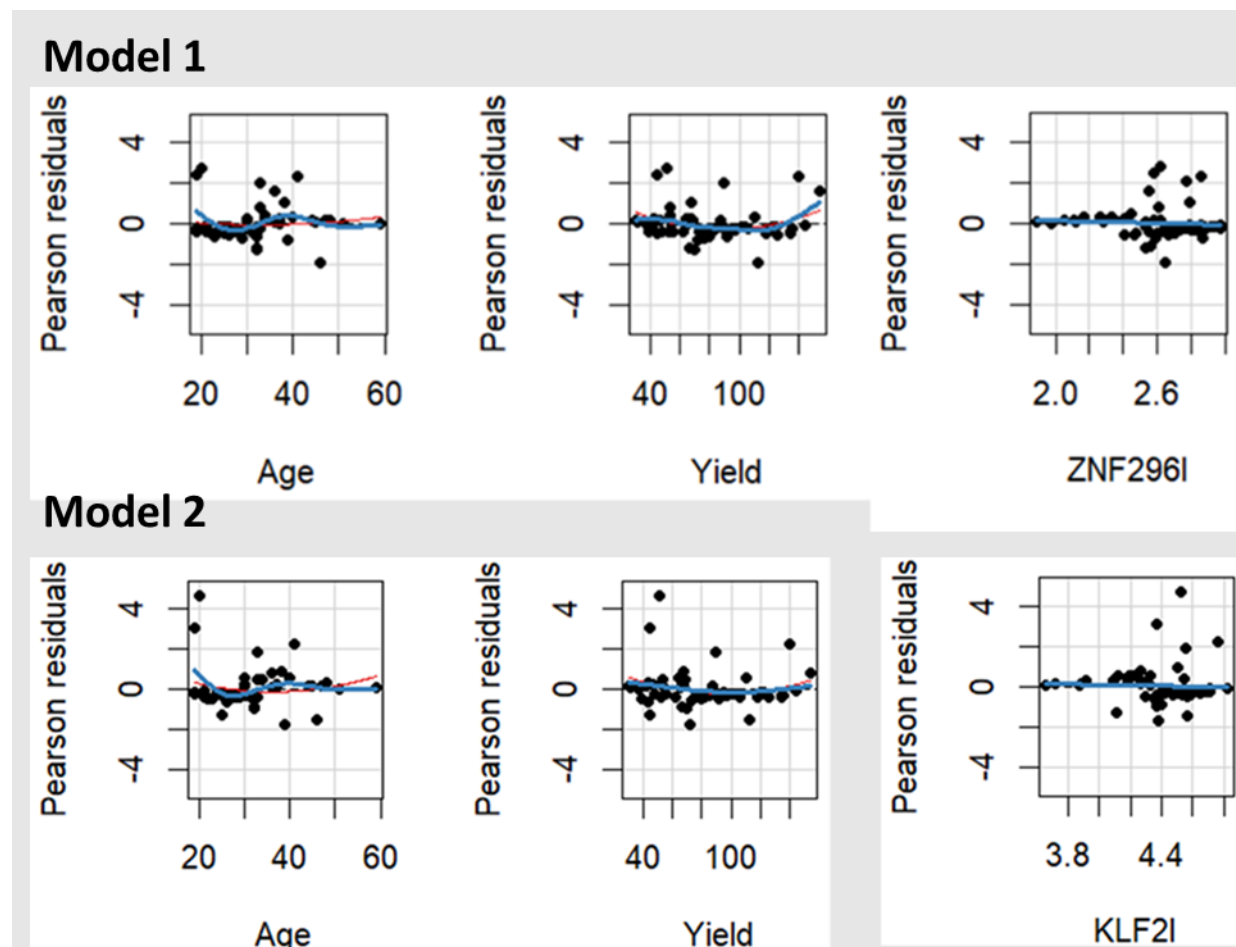

Supplementary figure 3A: Residual plots for the fitted models showing residue linearity assumption for the best-fit models. The red curve shows the fitted quadratic term and blue curve shows the fitted smoother-based term.

### Pearson Residual versus Fitted Analysis

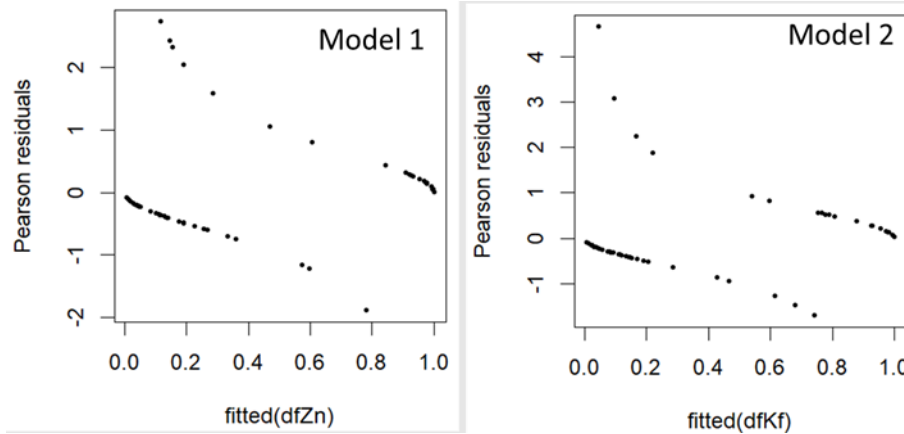

*Supplementary Figure 3B: Residual vs fitted analysis. Residuals for model 1 are all between -2 and 2.5 while a couple of outliers can be seen in model 2.*

### Mean- Variance Relationship Analysis

A Logistic regression model should show more uncertainty around fitted probabilities of 0.5 and lower uncertainty at the two extremes (0 and 1). To check this assumption, we plotted the mean fitted values vs residual variance, after the data were grouped in 5 bins (according to the fitted values) and both the fitted values mean and the residuals variance within each bin were measured.

A correct mean-variance relationship is shown for model 1. The higher variation in the first bin of model 2 is driven by the outlier still present in this analysis (subjects 5). This subject had very high expression levels of the host gene marker and was also possibly transitioning to subclinical/ ATB disease. Nonetheless, they were not considered highly influential on the model parameters (see **supplementary analysis 1**) and therefore were kept in the model.

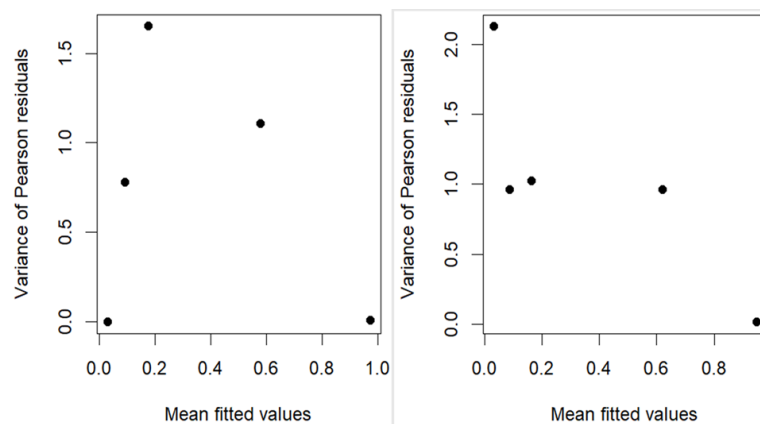

*Supplementary Figure 3C: Mean-variance relationship for the fitted models.*

Supplementary Analysis 4: Hosmer-Lemeshow test and plots for the logistic regression models with covariates ZNF296 and KLF2.

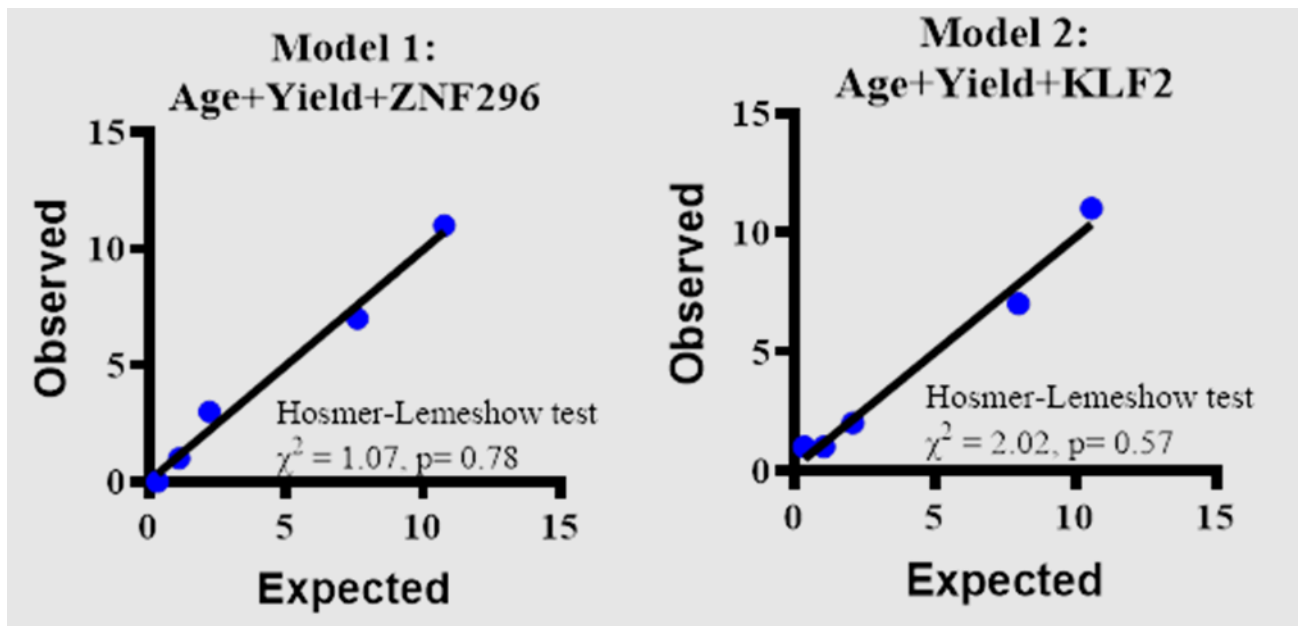

Supplementary figure 4: Hosmer-Lemeshow goodness of fit test was computed to assess model fit. Both models showed no evidence of poor model fit.

### *Supplementary Analysis 5: Bootstrap Analysis*

Bootstrap result for the best fit Models revealed that the bootstrap standard errors of the estimates of ZNF296 and KLF2 (2.22 and 2.52 respectively) were like those obtained in the standard logistic regression model (2.5 and 2.48) and the coefficient estimates (-6.56 and -6.24) were within the 95% CI of the bootstrap estimates.

| <b>ZNF296</b>  | <b>Estimate</b> | <b>SE</b> | <b>95% CI</b>   |
|----------------|-----------------|-----------|-----------------|
| $\beta_{MLE}$  | -6.56           | 2.50      | [-12.45, -2.36] |
| $\beta_{boot}$ | -4.72           | 2.22      | [-9.99, -1.40]  |
|                |                 |           |                 |
| <b>KLF2</b>    | <b>Estimate</b> | <b>SE</b> | <b>95% CI</b>   |
| $\beta_{MLE}$  | -6.24           | 2.48      | [-11.78, -1.87] |
| $\beta_{boot}$ | -4.52           | 2.52      | [-9.73, -0.73]  |
